# Supplementary material for: Pd@Pt Nanodendrites as Peroxidase Nanomimics for Enhanced Colorimetric ELISA of Cytokines with Femtomolar Sensitivity
Source: MDPI journal article supplement (doi:10.3390/chemosensors10090359), 2022-09-08
Supplement: s1 [file s1]

## Supporting Information

# Pd@Pt Nanodendrites as Peroxidase Nanomimics for Enhanced Colorimetric ELISA of Cytokines with Femtomolar Sensitivity

Zhuangqiang Gao \*, Chuanyu Wang, Jiacheng He and Pengyu Chen \*

Materials Research and Education Center, Materials Engineering, Department of Mechanical Engineering, Auburn University, Auburn, AL 36849, USA

\* Correspondence: zzg0028@auburn.edu (Z.G.); pengyuc@auburn.edu (P.C.)

### Additional Materials and Methods

#### S1. Chemicals and Materials.

Sodium tetrachloropalladate(II) ( $\text{Na}_2\text{PdCl}_4$ , 98%), potassium bromide (KBr,  $\geq 99\%$ ), L-ascorbic acid (AA,  $\geq 99\%$ ), poly(vinylpyrrolidone) (PVP,  $M_w \approx 55,000$ ), sodium hexachloroplatinate(IV) hexahydrate ( $\text{Na}_2\text{PtCl}_6 \cdot 6\text{H}_2\text{O}$ , 98%), 3,3',5,5'-tetramethylbenzidine (TMB,  $> 99\%$ ), and horseradish peroxidase (HRP) were obtained from Millipore Sigma. Hydrogen peroxide solution (30 wt% in  $\text{H}_2\text{O}$ ), sodium bicarbonate ( $\text{NaHCO}_3$ ,  $\geq 99.7\%$ ), sodium carbonate ( $\text{Na}_2\text{CO}_3$ ,  $\geq 99.5\%$ ), sodium phosphate dibasic ( $\text{Na}_2\text{HPO}_4$ ,  $\geq 99.0\%$ ), sodium chloride ( $\text{NaCl}$ ,  $\geq 99.0\%$ ), potassium phosphate monobasic ( $\text{KH}_2\text{PO}_4$ ,  $\geq 99.0\%$ ), potassium chloride (KCl,  $\geq 99.0\%$ ), Tween 20, citric acid, bovine serum albumin (BSA,  $\geq 98\%$ ), sucrose, and streptavidin (SA) were all obtained from VWR. Thiol-PEG-Carboxyl ( $M_w \approx 3400$ , HS-PEG-COOH) was obtained from Laysan Bio, Inc. N-ethyl-N'-(3-(dimethylamino)propyl)carbodiimide hydrochloride (EDC,  $\geq 98.0\%$ ) and N-hydroxysulfosuccinimide sodium salt (NHS,  $\geq 98.0\%$ ) were obtained from Tokyo Chemical Industry Co., Ltd. Human interleukin-6 (IL-6), mouse anti-cytokine capture antibody (CAb), biotin-conjugated detection antibodies (Biotin-DAb), and HRP-conjugated SA (HRP-SA) were obtained from Fisher Scientific, Inc. Deionized water (DI) with a resistivity of  $18.2 \text{ M}\Omega\text{-cm}$  was used throughout the experiments. 10 mM Carbonate-bicarbonate buffer (pH 9.6) was prepared by dissolving 1.59 g of  $\text{Na}_2\text{CO}_3$  and 2.93 g of  $\text{NaHCO}_3$  in 1.0 L of DI water. 10 mM phosphate-buffered saline (PBS, pH 7.4) was prepared by dissolving 1.15 g of  $\text{Na}_2\text{HPO}_4$ , 0.24 g of  $\text{KH}_2\text{PO}_4$ , 0.2 g of KCl, and 8.0 g of NaCl in 1.0 L of DI water. Citrate-phosphate buffer (pH 4.0) was prepared by 11.825 g of  $\text{Na}_2\text{HPO}_4$  and 2.3650 g citric acid in 1.0 L of DI water. Washing buffer was PBS (pH 7.4) containing 0.05% Tween 20 (PBST). Block-fix buffer was PBST containing 1% BSA and 15% sucrose. Dilution buffer was PBST containing 1% BSA.

#### S2. Characterizations.

The transmission electron microscope (TEM) images were taken using a Zeiss EM10 transmission electron microscope. The scanning electron microscopy (SEM) images and EDX spectra were obtained using a JEOL JSM-7000F microscope. The UV-vis spectra and kinetic curves of apparent steady-state kinetic assays were recorded using an Ultrospec 2100 pro UV-vis spectrophotometer (Amersham Biosciences). Dynamic light scattering (DLS) data were obtained using a Zetasizer Nano ZS90, Malvern. The absorbance of samples in wells of microplates was measured using a SpectraMax iD3 Multi-Mode Microplate Reader (Molecular Devices). Fourier-transform infrared (FT-IR) spectra were performed using a PerkinElmer Spectrum 400 FT-IR/FT-NIR Spectrometer.

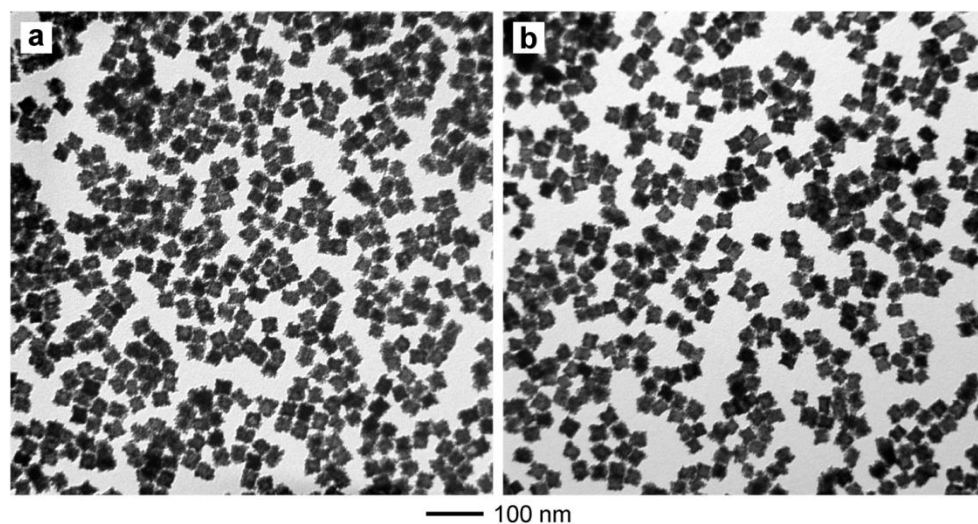

**Figure S1.** TEM images of Pd@Pt NDs synthesized from two other batches in addition to the batch shown in Figures 1d,e. It can be seen that these two-batch Pd@Pt NDs presented the same dendrite-like morphology as the Pd@Pt NDs shown in Figures 1d,e. The edge lengths of these two-batch Pd@Pt NDs and the Pd@Pt NDs shown in Figures 1d,e were measured to be  $27.3 \pm 1.4$  nm,  $27.2 \pm 1.5$  nm, and  $26.8 \pm 1.5$  nm, respectively, with the coefficient of variation (CV) of 1.0% ( $n = 3$ ). These results indicate that the Pd@Pt NDs can be readily reproduced with high uniformity.

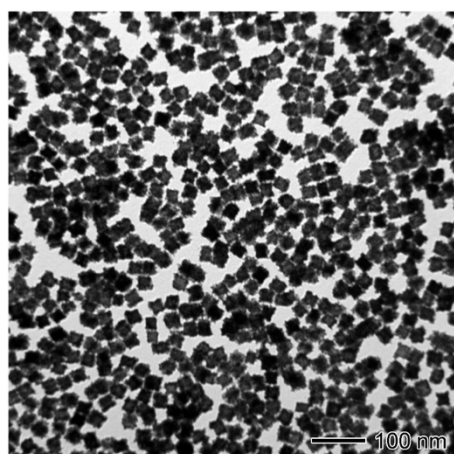

**Figure S2.** TEM image of Pd@Pt NDs prepared from 60-fold scale-up synthesis. Please see Materials and Methods for the detailed synthesis procedures.

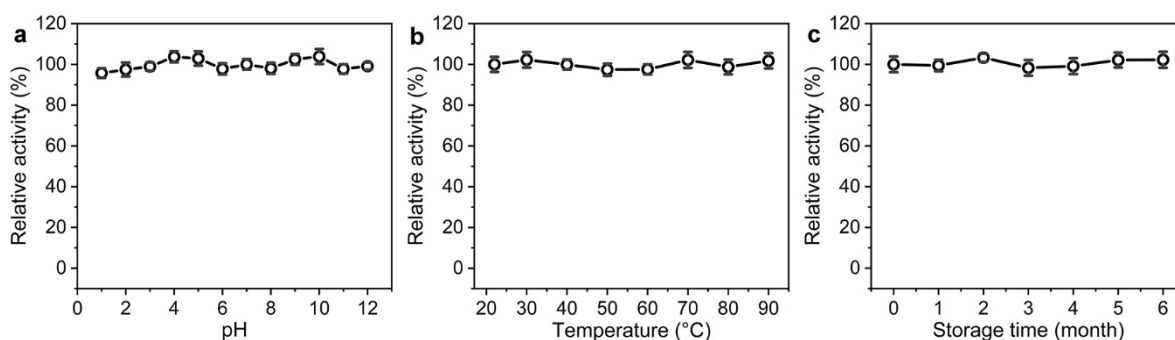

**Figure S3.** Stability evaluation for the peroxidase-like catalytic activity of Pd@Pt NDs. Relative catalytic activities of Pd@Pt NDs after incubation with acid or base (pH 1-12) for 2 h (a), treatment with heat (22-90 °C) for 2 h (b), and storage for different time (0-6 months, c), in which the activity at pH 4.0, 22 °C, and 0 month was set as 100%.

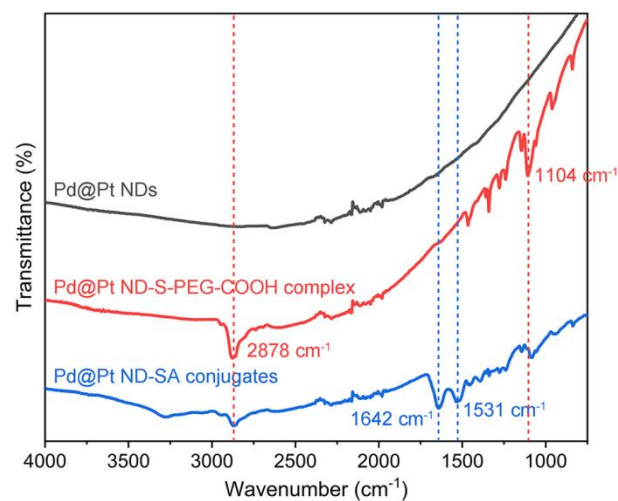

**Figure S4.** FT-IR spectra of Pd@Pt NDs (black curve), Pd@Pt ND-S-PEG-COOH complex (red curve), and Pd@Pt ND-SA conjugates (blue curve).

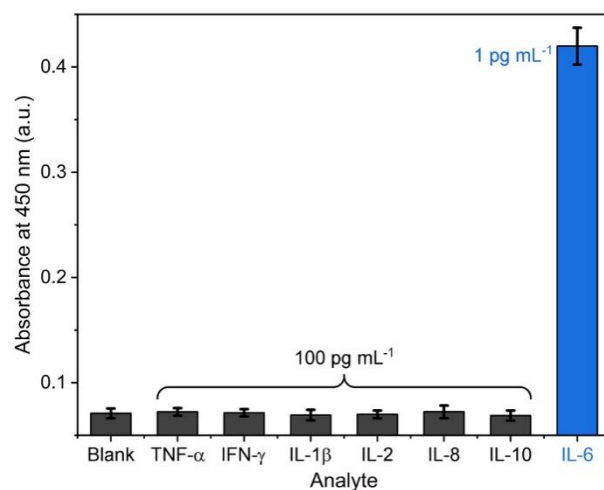

**Figure S5.** Specificity of Pd@Pt ND ELISA toward IL-6 detection. Bar graph showing the intensity of the detection signal for detection of IL-6 (1  $\text{pg mL}^{-1}$ ) and interfering cytokines including TNF- $\alpha$ , IFN- $\gamma$ , IL-1 $\beta$ , IL-2, IL-8, and IL-10 (100  $\text{pg mL}^{-1}$ ) using Pd@Pt ND ELISA.

**Table S1.** Comparison of the kinetic parameters of various catalysts toward the TMB+H<sub>2</sub>O<sub>2</sub> reaction.<sup>a</sup>

| Catalyst                                 | Size (nm)              | [E] (M)                | Substance                     | K <sub>m</sub> (M)    | V <sub>max</sub> (M s <sup>-1</sup> ) | K <sub>cat</sub> (s <sup>-1</sup> ) | Refs.     |
|------------------------------------------|------------------------|------------------------|-------------------------------|-----------------------|---------------------------------------|-------------------------------------|-----------|
| HRP                                      | N/A                    | 2.5×10 <sup>-11</sup>  | TMB                           | 4.3×10 <sup>-4</sup>  | 1.0×10 <sup>-7</sup>                  | 4.0×10 <sup>3</sup>                 | [30]      |
|                                          |                        | 2.5×10 <sup>-11</sup>  | H <sub>2</sub> O <sub>2</sub> | 3.7×10 <sup>-3</sup>  | 8.7×10 <sup>-8</sup>                  | 3.5×10 <sup>3</sup>                 |           |
| Fe <sub>3</sub> O <sub>4</sub> particles | 300 (diameter)         | 1.1×10 <sup>-12</sup>  | TMB                           | 9.8×10 <sup>-5</sup>  | 3.4×10 <sup>-8</sup>                  | 3.0×10 <sup>4</sup>                 | [30]      |
|                                          |                        | 1.1×10 <sup>-12</sup>  | H <sub>2</sub> O <sub>2</sub> | 1.5×10 <sup>-1</sup>  | 9.8×10 <sup>-8</sup>                  | 8.6×10 <sup>4</sup>                 |           |
| Co <sub>3</sub> O <sub>4</sub> cubes     | 20 (edge length)       | 3.4×10 <sup>-10</sup>  | TMB                           | 3.7×10 <sup>-5</sup>  | 6.3×10 <sup>-8</sup>                  | 1.8×10 <sup>2</sup>                 | [31]      |
|                                          |                        | 3.4×10 <sup>-10</sup>  | H <sub>2</sub> O <sub>2</sub> | 1.4×10 <sup>-1</sup>  | 1.2×10 <sup>-7</sup>                  | 3.5×10 <sup>2</sup>                 |           |
| MnO <sub>2</sub> particles               | 4.5 (diameter)         | 3.0×10 <sup>-8</sup>   | OPD                           | 3.1×10 <sup>-4</sup>  | 8.2×10 <sup>-8</sup>                  | 2.7×10 <sup>0</sup>                 | [66]      |
|                                          |                        | 3.0×10 <sup>-8</sup>   | H <sub>2</sub> O <sub>2</sub> | 1.2×10 <sup>-4</sup>  | 5.7×10 <sup>-8</sup>                  | 1.9×10 <sup>0</sup>                 |           |
| V <sub>2</sub> O <sub>5</sub> wires      | 100×500 (width×length) | 1.1×10 <sup>-4</sup>   | ABTS                          | 4.0×10 <sup>-7</sup>  | 2.8×10 <sup>-1</sup>                  | 2.5×10 <sup>3</sup>                 | [33]      |
|                                          |                        | N/A                    | H <sub>2</sub> O <sub>2</sub> | 2.9×10 <sup>-6</sup>  | N/A                                   | N/A                                 |           |
| Au particles                             | 40 (diameter)          | 6.7×10 <sup>-12</sup>  | TMB                           | N/A                   | 4.8×10 <sup>-8</sup>                  | 7.2×10 <sup>3</sup>                 | [52]      |
|                                          |                        | N/A                    | H <sub>2</sub> O <sub>2</sub> | N/A                   | N/A                                   | N/A                                 |           |
| Ru frames                                | 10 (diameter)          | 1.1×10 <sup>-12</sup>  | TMB                           | 6.0×10 <sup>-5</sup>  | 1.3×10 <sup>-7</sup>                  | 1.3×10 <sup>4</sup>                 | [42]      |
|                                          |                        | 1.1×10 <sup>-12</sup>  | H <sub>2</sub> O <sub>2</sub> | 3.8×10 <sup>-1</sup>  | 7.4×10 <sup>-8</sup>                  | 7.0×10 <sup>3</sup>                 |           |
| Au@Pt rods                               | 30×70 (width×length)   | 1.3×10 <sup>-11</sup>  | TMB                           | 2.7×10 <sup>-5</sup>  | 1.8×10 <sup>-7</sup>                  | 1.4×10 <sup>4</sup>                 | [63]      |
|                                          |                        | N/A                    | H <sub>2</sub> O <sub>2</sub> | N/A                   | N/A                                   | N/A                                 |           |
| Pt particles                             | 5-7 (diameter)         | 8.1×10 <sup>-11</sup>  | TMB                           | 1.2×10 <sup>-4</sup>  | 1.3×10 <sup>-6</sup>                  | 2.3×10 <sup>4</sup>                 | [62]      |
|                                          |                        | 8.1×10 <sup>-11</sup>  | H <sub>2</sub> O <sub>2</sub> | 7.7×10 <sup>-1</sup>  | 1.9×10 <sup>-6</sup>                  | 1.6×10 <sup>4</sup>                 |           |
| Pd cubes                                 | 18 (edge length)       | 1.4×10 <sup>-12</sup>  | TMB                           | 5.4×10 <sup>-5</sup>  | 9.7×10 <sup>-8</sup>                  | 6.9×10 <sup>4</sup>                 | [65]      |
|                                          |                        | 1.4×10 <sup>-12</sup>  | H <sub>2</sub> O <sub>2</sub> | 7.0×10 <sup>-1</sup>  | 6.5×10 <sup>-8</sup>                  | 4.6×10 <sup>4</sup>                 |           |
| Pd-Ru cubes                              | 20 (edge length)       | N/A                    | TMB                           | N/A                   | N/A                                   | 4.8×10 <sup>5</sup>                 | [67]      |
|                                          |                        | N/A                    | H <sub>2</sub> O <sub>2</sub> | N/A                   | N/A                                   | N/A                                 |           |
| Pt cubes                                 | 7.4 (edge length)      | 4.1×10 <sup>-13</sup>  | TMB                           | 7.3×10 <sup>-4</sup>  | 3.3×10 <sup>-7</sup>                  | 8.2×10 <sup>5</sup>                 | [68]      |
|                                          |                        | N/A                    | H <sub>2</sub> O <sub>2</sub> | N/A                   | N/A                                   | N/A                                 |           |
| Au@Pt particles                          | 42 (diameter)          | 6.3×10 <sup>-14</sup>  | TMB                           | N/A                   | 9.7×10 <sup>-8</sup>                  | 1.5×10 <sup>6</sup>                 | [52]      |
|                                          |                        | N/A                    | H <sub>2</sub> O <sub>2</sub> | N/A                   | N/A                                   | N/A                                 |           |
| Pd-Ir cubes                              | 19.2 (edge length)     | 3.4×10 <sup>-14</sup>  | TMB                           | 1.3×10 <sup>-4</sup>  | 6.5×10 <sup>-8</sup>                  | 1.9×10 <sup>6</sup>                 | [65]      |
|                                          |                        | 3.4×10 <sup>-14</sup>  | H <sub>2</sub> O <sub>2</sub> | 3.4×10 <sup>-1</sup>  | 5.1×10 <sup>-8</sup>                  | 1.5×10 <sup>6</sup>                 |           |
| Pd@Pt cubes                              | 20 (edge length)       | 2.6×10 <sup>-13</sup>  | TMB                           | 3.4×10 <sup>-4</sup>  | 6.0×10 <sup>-7</sup>                  | 2.3×10 <sup>6</sup>                 | [69]      |
|                                          |                        | 2.6×10 <sup>-13</sup>  | H <sub>2</sub> O <sub>2</sub> | 7.7×10 <sup>-1</sup>  | 5.8×10 <sup>-7</sup>                  | 2.2×10 <sup>6</sup>                 |           |
| Concave Pt cubes                         | 44 (diameter)          | 2.5×10 <sup>-14</sup>  | TMB                           | N/A                   | 1.5×10 <sup>-7</sup>                  | 6.0×10 <sup>6</sup>                 | [51]      |
|                                          |                        | 2.5×10 <sup>-14</sup>  | H <sub>2</sub> O <sup>+</sup> | N/A                   | 1.3×10 <sup>-7</sup>                  | 5.1×10 <sup>6</sup>                 |           |
| Pd@Pt NDs                                | 27 (edge length)       | 2.44×10 <sup>-14</sup> | TMB                           | 6.63×10 <sup>-4</sup> | 2.21×10 <sup>-7</sup>                 | 9.06×10 <sup>6</sup>                | This work |
|                                          |                        | 2.44×10 <sup>-14</sup> | H <sub>2</sub> O <sub>2</sub> | 3.82×10 <sup>0</sup>  | 1.86×10 <sup>-7</sup>                 | 7.62×10 <sup>6</sup>                |           |

<sup>a</sup>[E] is the catalyst concentration, K<sub>m</sub> is the Michaelis-Menten constant, V<sub>max</sub> is the maximal reaction rate, K<sub>cat</sub> is the catalytic constant, where K<sub>cat</sub>=V<sub>max</sub>/[E], and N/A is “not applicable”. The mechanism behind the catalysis of Pd@Pt NDs toward the TMB+H<sub>2</sub>O<sub>2</sub> reaction was proposed as shown in the following schematic, in which the catalytic effect of Pd@Pt NDs on H<sub>2</sub>O<sub>2</sub> decomposition could be better understood [62,65].

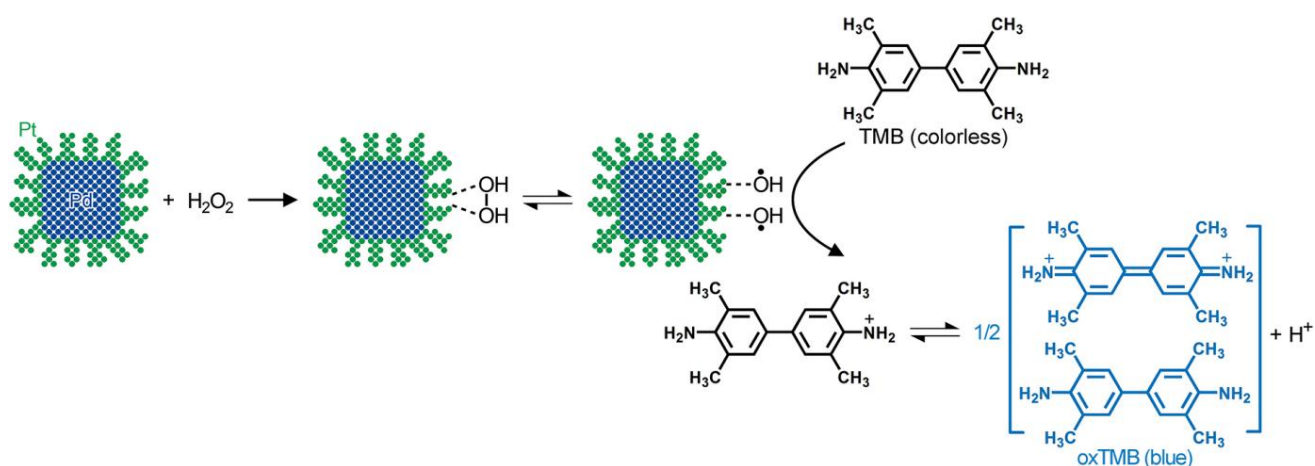

**Table S2.** Comparison of the limits of detection (LODs) of colorimetric Pd@Pt ND ELISA with some different commercial colorimetric ELISA kits in IL-6 detection.

| Detection method      | Manufacturer      | Catalog number | LOD (pg mL <sup>-1</sup> ) | LOD (fM) |
|-----------------------|-------------------|----------------|----------------------------|----------|
| Commercial ELISA kits | Fisher Scientific | KAC1261        | 2                          | 76.9     |
|                       |                   | KHC0061        | 2                          | 76.9     |
|                       |                   | EH2IL6         | 1                          | 38.5     |
|                       |                   | BMS213-2       | 0.92                       | 35.4     |
|                       | Millipore Sigma   | RAB0306-1KT    | 3                          | 115.4    |
|                       |                   | RAB0307-1KT    | 3                          | 115.4    |
|                       | Abcam             | ab100573       | 30                         | 1,153.8  |
|                       |                   | ab100572       | 3                          | 115.4    |
|                       |                   | ab46027        | 2                          | 76.9     |
|                       |                   | ab178013       | 1.6                        | 61.5     |
|                       |                   | ab46042        | 0.8                        | 30.8     |
|                       | R&D Systems       | QK206          | 2.95                       | 113.5    |
|                       |                   | D6050          | 0.7                        | 26.9     |
| Pd@Pt ND ELISA        | This work         | This work      | 0.044                      | 1.7      |

**Table S3.** Intra- and inter-batch coefficients of variation (CVs,  $n = 6$ ) of Pd@Pt ND ELISA in detecting 0.1, 1, and 10 pg mL<sup>-1</sup> IL-6 standards.

|                   | IL-6 conc. (pg mL <sup>-1</sup> ) | Absorbance at 450 nm (a.u.) |        |        |        |        |        | Mean (a.u.) | Standard deviation (SD, a.u.) | CV (% , n = 6) |
|-------------------|-----------------------------------|-----------------------------|--------|--------|--------|--------|--------|-------------|-------------------------------|----------------|
|                   |                                   | 1                           | 2      | 3      | 4      | 5      | 6      |             |                               |                |
| Intra-batch assay | 0.1                               | 0.0992                      | 0.0981 | 0.0911 | 0.1020 | 0.0992 | 0.0894 | 0.0965      | 0.0050                        | 5.22           |
|                   | 1                                 | 0.4276                      | 0.4005 | 0.4325 | 0.4105 | 0.4390 | 0.4044 | 0.4191      | 0.0160                        | 3.82           |
|                   | 10                                | 2.1794                      | 1.9950 | 2.2002 | 2.2437 | 2.1337 | 1.9646 | 2.1194      | 0.1142                        | 5.39           |
| Inter-batch assay | 0.1                               | 0.1052                      | 0.1024 | 0.0990 | 0.0891 | 0.0833 | 0.0943 | 0.0956      | 0.0083                        | 8.70           |
|                   | 1                                 | 0.4447                      | 0.4303 | 0.4253 | 0.4052 | 0.3862 | 0.4328 | 0.4208      | 0.0213                        | 5.06           |
|                   | 10                                | 2.2067                      | 2.3171 | 2.0749 | 2.0527 | 1.9167 | 2.2948 | 2.1438      | 0.1558                        | 7.27           |
